# Supplementary material for: Effectiveness of Telemedicine Visits in Reducing 30‐Day Readmissions Among Patients With Heart Failure During the COVID‐19 Pandemic
Source: PubMed Central journal article supplement — J Am Heart Assoc. 2022 Mar 1;11(7):e023935. doi: 10.1161/JAHA.121.023935 (PMC9075458; doi:10.1161/jaha.121.023935), 2022-03-01

# **SUPPLEMENTAL MATERIAL**

**Table S1. Factors Associated with Early Outpatient Follow-up during COVID-19 that were included in the IPW (N = 6,918).**

| Variables                              | Model 1 |             |         | Model 2 |             |         |
|----------------------------------------|---------|-------------|---------|---------|-------------|---------|
|                                        | OR      | (95% CI)    | P value | OR      | (95% CI)    | P value |
| Age                                    | 1.00    | (1.00-1.01) | .345    | 1.00    | (1.00-1.01) | .696    |
| Female                                 | 1.09    | (0.97-1.22) | .149    | 1.09    | (0.98-1.22) | .113    |
| Race (Ref: NH White)                   |         |             |         |         |             |         |
| NH Black                               | 1.08    | (0.95-1.23) | .252    | 1.05    | (0.93-1.18) | .464    |
| Other                                  | 1.02    | (0.83-1.27) | .829    | 1.02    | (0.82-1.26) | .891    |
| Currently married                      | 0.95    | (0.85-1.07) | .416    |         |             |         |
| Insurance (Ref: Medicare FFS)          |         |             |         |         |             |         |
| Medicare Advantage                     | 0.85    | (0.75-0.96) | .009    |         |             |         |
| Medicaid/Self-pay                      | 0.83    | (0.66-1.04) | .104    |         |             |         |
| Other                                  | 0.97    | (0.82-1.14) | .689    |         |             |         |
| Disadvantaged neighborhood             | 0.75    | (0.64-0.89) | .001    | 0.75    | (0.64-0.88) | <.001   |
| Acute MI                               | 0.98    | (0.78-1.22) | .850    |         |             |         |
| Angina                                 | 0.91    | (0.81-1.03) | .137    |         |             |         |
| Stroke or TIA                          | 1.09    | (0.82-1.46) | .542    |         |             |         |
| Atrial fibrillation or flutter         | 1.51    | (1.35-1.70) | <.001   | 1.57    | (1.40-1.76) | <.001   |
| Mitral or aortic valvular disease      | 1.19    | (1.05-1.36) | .008    | 1.21    | (1.06-1.37) | .004    |
| Peripheral vascular disease            | 1.02    | (0.87-1.18) | .844    |         |             |         |
| Hypertension                           | 1.13    | (0.92-1.37) | .244    |         |             |         |
| Diabetes mellitus                      | 0.90    | (0.81-1.02) | .089    |         |             |         |
| Hyperlipidemia                         | 1.20    | (1.06-1.35) | .004    | 1.19    | (1.07-1.33) | .002    |
| COPD                                   | 0.97    | (0.86-1.09) | .606    |         |             |         |
| Renal disease                          | 0.95    | (0.82-1.10) | .485    |         |             |         |
| Depression                             | 1.05    | (0.92-1.19) | .506    |         |             |         |
| Dementia                               | 0.78    | (0.63-0.95) | .014    |         |             |         |
| Coronary artery bypass graft surgery   | 1.81    | (1.30-2.52) | <.001   | 1.72    | (1.25-2.37) | .001    |
| Percutaneous coronary intervention     | 1.56    | (1.12-2.17) | .008    | 1.54    | (1.14-2.06) | .004    |
| Permanent pacemaker                    | 2.04    | (1.08-3.87) | .029    |         |             |         |
| Implantable cardioverter defibrillator | 1.64    | (1.03-2.61) | .039    |         |             |         |
| eGFR (Ref: ≥60)                        |         |             |         |         |             |         |
| 45 - 60                                | 1.12    | (0.96-1.31) | .164    | 1.07    | (0.93-1.24) | .347    |
| 30 - 45                                | 1.06    | (0.88-1.27) | .558    | 0.99    | (0.85-1.16) | .913    |
| <30                                    | 0.89    | (0.73-1.08) | .236    | 0.79    | (0.69-0.91) | .001    |
| Unknown                                | 0.76    | (0.35-1.66) | .487    | 0.46    | (0.24-0.85) | .014    |
| Potassium (Ref: 4.0 - 4.9)             |         |             |         |         |             |         |
| <4.0                                   | 0.97    | (0.87-1.08) | .610    |         |             |         |
| ≥5.0                                   | 1.01    | (0.82-1.26) | .897    |         |             |         |
| Unknown                                | 0.56    | (0.18-1.80) | .333    |         |             |         |
| Hemoglobin (Ref: ≥12.0)                |         |             |         |         |             |         |
| <10.0                                  | 0.84    | (0.74-0.97) | .017    |         |             |         |
| 10.0 - 11.9                            | 0.91    | (0.80-1.04) | .162    |         |             |         |
| Unknown                                | 0.61    | (0.24-1.55) | .301    |         |             |         |
| Beta blocker                           | 1.16    | (1.01-1.33) | .037    |         |             |         |
| ACEI/ARB/ARNI                          | 1.11    | (0.98-1.24) | .091    |         |             |         |
| Hydralazine                            | 0.85    | (0.74-0.97) | .018    |         |             |         |
| Loop diuretics                         | 1.22    | (1.08-1.39) | .002    | 1.22    | (1.08-1.38) | .001    |

|                                    |                  |       |                  |       |
|------------------------------------|------------------|-------|------------------|-------|
| Aldosterone antagonist             | 1.26 (1.11-1.43) | <.001 | 1.30 (1.15-1.48) | <.001 |
| Statin                             | 1.02 (0.90-1.17) | .726  |                  |       |
| Aspirin                            | 1.25 (1.11-1.41) | <.001 | 1.24 (1.10-1.39) | <.001 |
| Principle HF hospitalizations      | 1.77 (1.56-2.02) | <.001 | 1.77 (1.56-2.01) | <.001 |
| Admission through ED               | 1.40 (1.24-1.58) | <.001 | 1.40 (1.25-1.58) | <.001 |
| Length of stay                     | 1.00 (1.00-1.01) | .245  |                  |       |
| Discharge to Home with Home Health | 1.01 (0.90-1.14) | .857  |                  |       |
| Hospitalizations in the past year  | 1.09 (0.98-1.21) | .104  |                  |       |
| Has a PCP on file                  | 2.60 (2.21-3.07) | <.001 | 2.58 (2.19-3.04) | <.001 |
| BIC                                | 9371.611         |       | 9175.515         |       |

Abbreviations: ACEI: Angiotensin-converting enzyme inhibitors; ARB: Angiotensin II receptor blockers; ARNI: Angiotensin receptor neprilysin inhibitor; COPD: Chronic obstructive pulmonary disease; ED: Emergency department, eGFR: Estimated glomerular filtration rate; FFS: Fee-for-Service; HF: Heart Failure; IPW: Inverse probability weighting; IQR: Interquartile range; MI: Myocardial infarction; PCP: Primary care provider; TIA, Transient ischemic attack.

Note: Regression models compare outcomes for patients who received early outpatient follow-up vs. those who did not receive early outpatient follow-up (reference group).

Model 1 was fully adjusted. Model 2 retained key patient characteristics (age, sex, race, and insurance) and included significant variables based on backward stepwise-selection procedures (.01 threshold).

**Table S2. Characteristics of Study Participants in the Pre- and COVID-19 Time Periods.**

|                                         | <b>Total<br/>(N =14,671)</b> | <b>Pre-COVID<br/>(N = 7,753)</b> | <b>COVID<br/>(N =6,918)</b> | <b>P value</b> |
|-----------------------------------------|------------------------------|----------------------------------|-----------------------------|----------------|
| <b>Sociodemographic Characteristics</b> |                              |                                  |                             |                |
| Age, median (IQR)                       | 68 (19)                      | 67 (19)                          | 68 (19)                     | .049           |
| Female                                  | 6,807 (46.40)                | 3,645 (47.0)                     | 3,162 (45.7)                | .113           |
| Race                                    |                              |                                  |                             | .757           |
| Non-Hispanic White                      | 7,715 (52.6)                 | 4,065 (52.4)                     | 3,650 (52.8)                |                |
| Non-Hispanic Black                      | 5,899 (40.2)                 | 3,137 (40.5)                     | 2,762 (39.9)                |                |
| Other                                   | 1,057 (7.2)                  | 551 (7.1)                        | 506 (7.3)                   |                |
| Currently married                       | 6,849 (46.7)                 | 3,660 (47.2)                     | 3,189 (46.1)                | .178           |
| Insurance                               |                              |                                  |                             | .007           |
| Medicare FFS                            | 6,368 (43.4)                 | 3,452 (44.5)                     | 2,916 (42.2)                |                |
| Medicare Advantage                      | 4,226 (28.8)                 | 2,147 (27.7)                     | 2,079 (30.1)                |                |
| Medicaid                                | 1,301 (8.9)                  | 697 (9.0)                        | 604 (8.7)                   |                |
| Other                                   | 2,776 (18.9)                 | 1,457 (18.8)                     | 1,319 (19.1)                |                |
| Disadvantaged neighborhood              | 2,081 (14.2)                 | 1,111 (14.3)                     | 970 (14.0)                  | .593           |
| <b>Diagnosis and Procedures</b>         |                              |                                  |                             |                |
| Acute MI                                | 1,075 (7.3)                  | 560 (7.2)                        | 515 (7.4)                   | .608           |
| Angina                                  | 6,849 (46.7)                 | 3,660 (47.2)                     | 3,189 (46.1)                | .505           |
| Stroke or TIA                           | 1,060 (7.2)                  | 529 (6.8)                        | 531 (7.7)                   | .047           |
| Atrial fibrillation or flutter          | 6,003 (40.9)                 | 3,142 (40.5)                     | 2,861 (41.4)                | .308           |
| Mitral or aortic valvular disease       | 3,165 (21.6)                 | 1,660 (21.4)                     | 1,505 (21.8)                | .613           |
| Peripheral vascular disease             | 2,046 (14.0)                 | 1,072 (13.8)                     | 974 (14.1)                  | .660           |
| Hypertension                            | 13,428 (91.5)                | 7,079 (91.3)                     | 6,349 (91.8)                | .309           |
| Diabetes mellitus                       | 7,442 (50.7)                 | 3,890 (50.2)                     | 3,552 (51.3)                | .157           |
| Hyperlipidemia                          | 9,077 (61.9)                 | 4,708 (60.7)                     | 4,369 (63.2)                | .002           |
| COPD                                    | 3,930 (26.8)                 | 2,150 (27.7)                     | 1,780 (25.7)                | .006           |
| Renal disease                           | 7,370 (50.2)                 | 3,845 (49.6)                     | 3,525 (51.0)                | .100           |
| Depression                              | 2,976 (20.3)                 | 1,474 (19.0)                     | 1,502 (21.7)                | <.001          |
| Dementia                                | 1,060 (7.2)                  | 529 (6.8)                        | 531 (7.7)                   | .047           |
| Coronary artery bypass graft surgery    | 419 (2.9)                    | 219 (2.8)                        | 200 (2.9)                   | .810           |
| Percutaneous coronary intervention      | 426 (2.9)                    | 215 (2.8)                        | 211 (3.1)                   | .319           |
| Permanent pacemaker                     | 109 (0.7)                    | 60 (0.8)                         | 49 (0.7)                    | .644           |
| Implantable cardioverter defibrillator  | 166 (1.1)                    | 75 (1.0)                         | 91 (1.3)                    | .047           |
| <b>Lab Values</b>                       |                              |                                  |                             |                |
| eGFR, mL/min/1.73m <sup>2</sup>         |                              |                                  |                             | .002           |
| ≥60                                     | 6,298 (42.9)                 | 3,283 (42.3)                     | 3,015 (43.6)                |                |
| 45 - 60                                 | 2,764 (18.8)                 | 1,555 (20.1)                     | 1,209 (17.5)                |                |
| 30 - 45                                 | 2,297 (15.7)                 | 1,214 (15.7)                     | 1,083 (15.7)                |                |
| <30                                     | 3,178 (21.7)                 | 1,632 (21.1)                     | 1,546 (22.4)                |                |
| Unknown                                 | 134 (0.9)                    | 69 (0.9)                         | 65 (0.9)                    |                |
| Potassium, mEq/L                        |                              |                                  |                             | .034           |
| <4.0                                    | 6,579 (44.8)                 | 3,516 (45.4)                     | 3,063 (44.3)                |                |
| 4.0 - 4.9                               | 7,118 (48.5)                 | 3,755 (48.4)                     | 3,363 (48.6)                |                |
| ≥5.0                                    | 876 (6.0)                    | 425 (5.5)                        | 451 (6.5)                   |                |
| Unknown                                 | 98 (0.7)                     | 57 (0.7)                         | 41 (0.6)                    |                |
| Hemoglobin, g/dL                        |                              |                                  |                             | .012           |
| <10.0                                   | 4,956 (33.8)                 | 2,587 (33.4)                     | 2,369 (34.2)                |                |
| 10.0 - 11.9                             | 4,737 (32.3)                 | 2,586 (33.4)                     | 2,151 (31.1)                |                |
| ≥12.0                                   | 4,866 (33.2)                 | 2,514 (32.4)                     | 2,352 (34.0)                |                |
| Unknown                                 | 112 (0.8)                    | 66 (0.9)                         | 46 (0.7)                    |                |
| <b>Medications</b>                      |                              |                                  |                             |                |
| Beta blocker                            | 11,473 (78.2)                | 5,825 (75.1)                     | 5,648 (81.6)                | <.001          |
| ACEI/ARB/ARNI                           | 3,900 (26.6)                 | 1,834 (23.7)                     | 2,066 (29.9)                | <.001          |

|                                    |               |              |              |       |
|------------------------------------|---------------|--------------|--------------|-------|
| Hydralazine                        | 3,214 (21.9)  | 1,574 (20.3) | 1,640 (23.7) | <.001 |
| Loop diuretics                     | 10,337 (70.5) | 5,169 (66.7) | 5,168 (74.7) | <.001 |
| Aldosterone antagonist             | 3,290 (22.4)  | 1,579 (20.4) | 1,711 (24.7) | <.001 |
| Statin                             | 9,602 (65.5)  | 4,769 (61.5) | 4,833 (69.9) | <.001 |
| Aspirin                            | 9,385 (64.0)  | 4,660 (60.1) | 4,725 (68.3) | <.001 |
| <b>Healthcare Utilization</b>      |               |              |              |       |
| Principle HF hospitalizations      | 3,529 (24.1)  | 1,917 (24.7) | 1,612 (23.3) | .044  |
| Admission through ED               | 9,885 (67.4)  | 5,125 (66.1) | 4,760 (68.8) | <.001 |
| Length of stay, median (IQR)       | 4.13 (4.9)    | 4.04 (4.8)   | 4.3 (5.3)    | <.001 |
| Discharge destination              |               |              |              | .021  |
| Home without Home Health           | 10,457 (71.3) | 5,589 (72.1) | 4,868 (70.4) |       |
| Home with Home Health              | 4,214 (28.7)  | 2,164 (27.9) | 2,050 (29.6) |       |
| Hospitalizations in the past year* | 7,441 (50.7)  | 4,058 (52.3) | 3,383 (48.9) | <.001 |
| Has a PCP on file                  | 12,538 (85.5) | 6,611 (85.3) | 5,927 (85.7) | .487  |
| 30-day readmission                 | 2,782 (19.0)  | 1,470 (19.0) | 1,312 (19.0) | .994  |
| 30-day readmission or mortality    | 2,952 (20.1)  | 1,560 (20.1) | 1,392 (20.1) | 1.00  |
| Early outpatient follow-up         |               |              |              | <.001 |
| No early follow-up                 | 8,138 (55.5)  | 4,427 (57.1) | 3,711 (53.6) |       |
| Early follow-up – in person        | 5,986 (40.8)  | 3,305 (42.6) | 2,681 (38.8) |       |
| Early follow-up – telemedicine     | 547 (3.7)     | 21 (0.3)     | 526 (7.6)    |       |

Abbreviations: ACEI: Angiotensin-converting enzyme inhibitors; ARB: Angiotensin II receptor blockers; ARNI: Angiotensin receptor neprilysin inhibitor; COPD: Chronic obstructive pulmonary disease; COVID-19: Coronavirus Disease 2019; ED: Emergency department, eGFR: Estimated glomerular filtration rate; FFS: Fee-for-Service; HF: Heart Failure; IQR: Interquartile range; MI: Myocardial infarction; PCP: Primary care provider; TIA, Transient ischemic attack.

Note: Categorical variables reported as n (%) and continuous variables reported as median (IQR).

Pre-COVID-19 period: 03/17/2019-03/15/2020. COVID-19 period: 03/16/2020-03/14/2021.

**Table S3. Unadjusted and Adjusted Odds Ratios for the Association between Early Outpatient Follow-up within 7 Days and 30-Day Readmission and Mortality in Patients with Heart Failure (N = 6,918)**

|                                        | <b>Unadjusted<br/>OR (95% CI)</b> | <b>P value</b> | <b>Adjusted<br/>OR (95% CI)</b> | <b>P value</b> |
|----------------------------------------|-----------------------------------|----------------|---------------------------------|----------------|
| <b>30-Day Readmission</b>              |                                   |                |                                 |                |
| No early follow-up                     | 1.00 (reference)                  |                | 1.00 (reference)                |                |
| In-person                              | 0.69 (0.59-0.81)                  | <.001          | 0.70 (0.60-0.82)                | <.001          |
| Telemedicine                           | 0.76 (0.56-1.03)                  | .078           | 0.69 (0.51-0.94)                | .018           |
| <b>30-Day Readmission or mortality</b> |                                   |                |                                 |                |
| No early follow-up                     | 1.00 (reference)                  |                | 1.00 (reference)                |                |
| In-person                              | 0.65 (0.56-0.76)                  | <.001          | 0.66 (0.56-0.78)                | <.001          |
| Telemedicine                           | 0.74 (0.55-1.00)                  | .051           | 0.68 (0.50-0.91)                | .011           |

Abbreviations: CI: Confidence Interval; OR: Odds ratio.

Note: Adjusted logistic regression models included patient sociodemographic characteristics, diagnoses and procedures, lab values, medications, healthcare utilization measures, and neighborhood disadvantage.

**Figure S1. Confounding Factors among HF Patients with and without an Early Follow-up Compared Using Standardized Differences.**

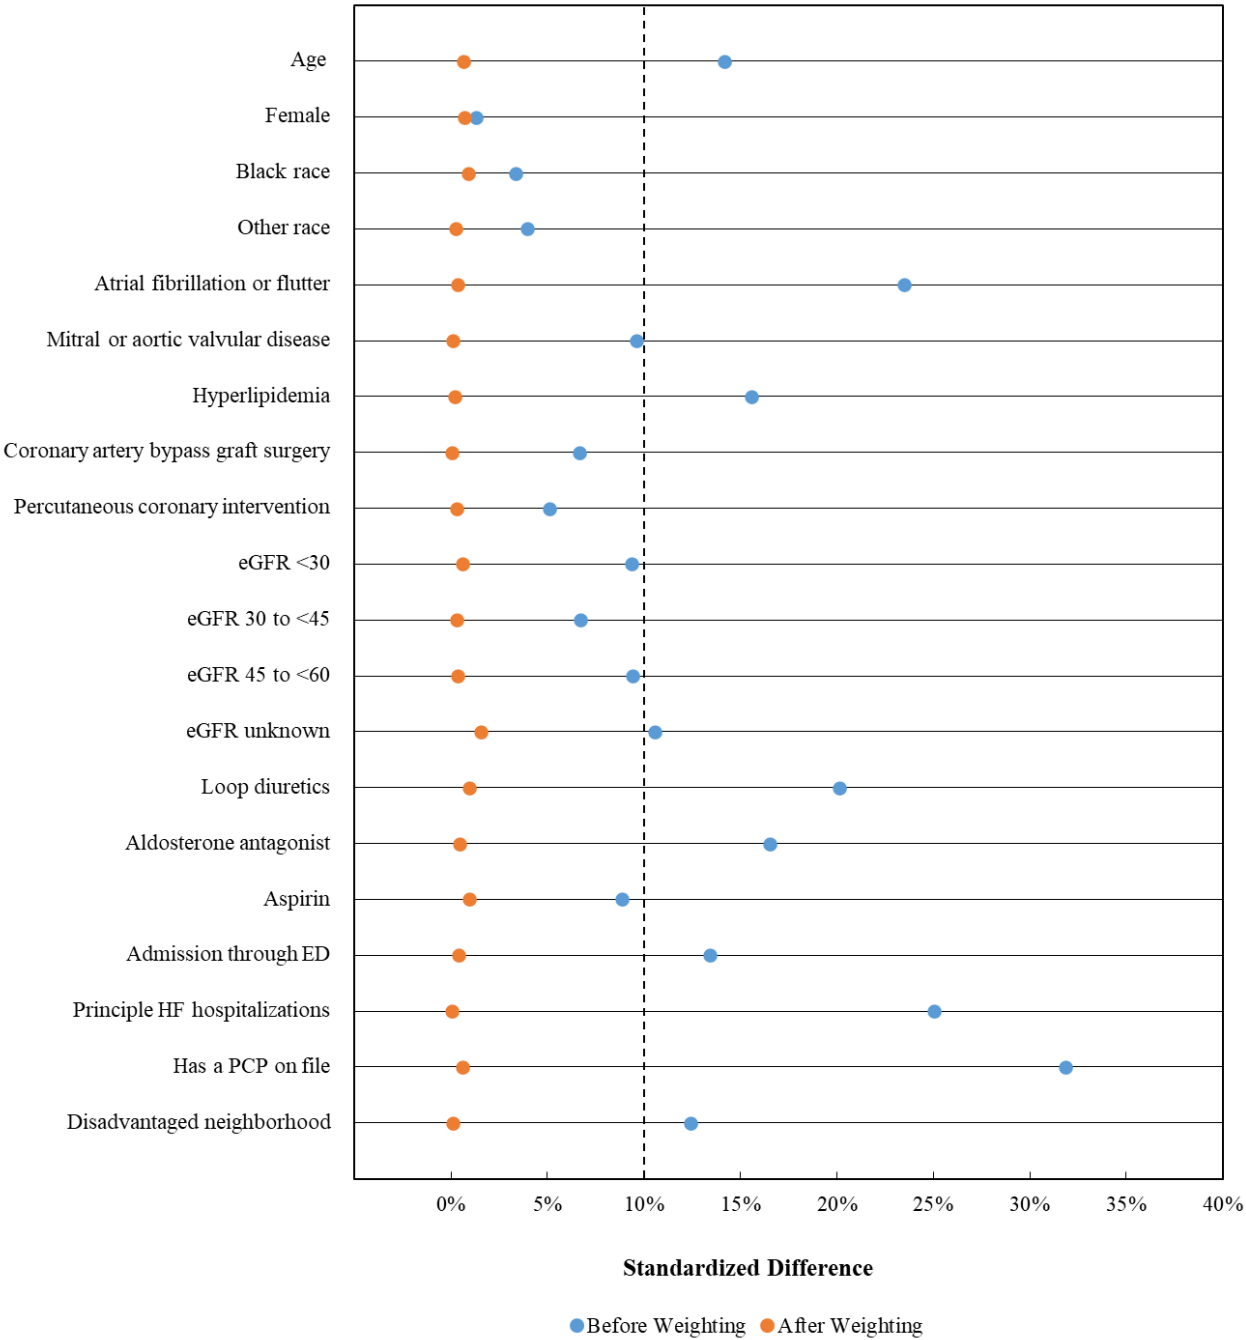

**Figure S2. Estimated Density of the Propensity Scores (PS) among HF Patients with and without an Early Follow-up before and after PS Weighting.**

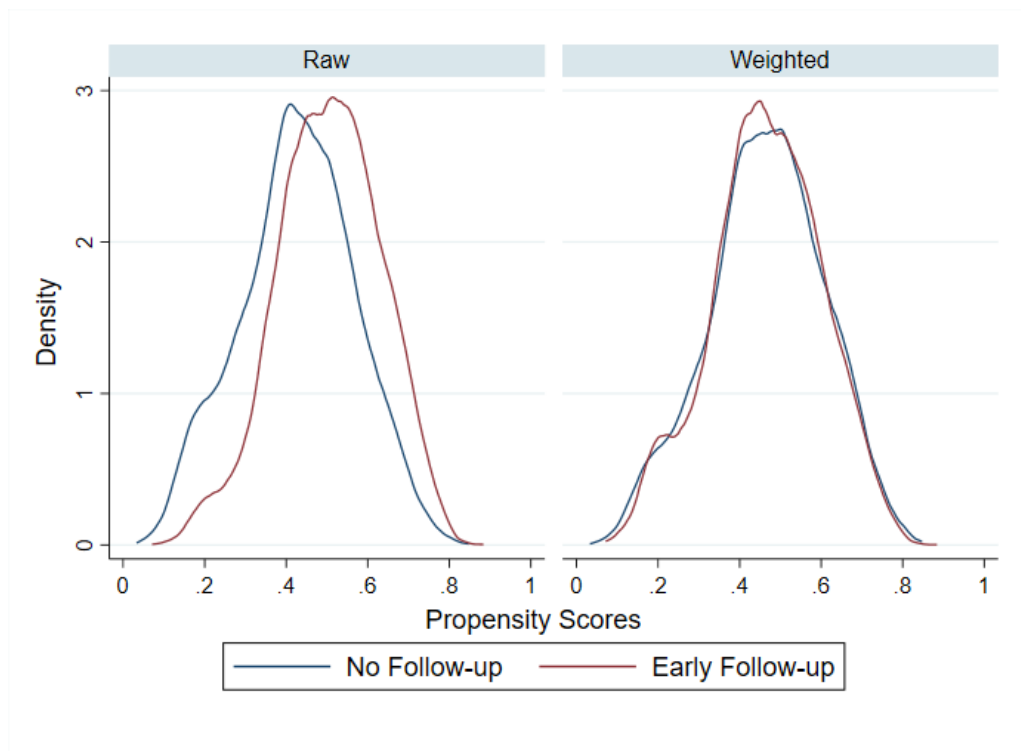

Supplement: JAH3-11-e023935-s001.pdf [file JAH3-11-e023935-s001.pdf]
